# Supplementary material
Source: PubMed Central journal article supplement (PMC5641855)
Supplement: flgastro-2017-100806supp001.pdf [file flgastro-2017-100806supp001.pdf]

## **Appendix 1: Contributing centres:**

**We would like to thank respondents contributing to the survey from the following centres:**

Aberdeen Royal Infirmary  
Addenbrookes, Cambridge  
Aintree University Hospital  
Aneurin Bevan University Health Board  
Arrowe Park Hospital  
Ayreshire Hospital  
Barnet Hospital  
Barts Health NHS Trust  
Birmingham Children's Hospital  
Birmingham Heartlands Hospital  
Borders General Hospital, Melrose  
Brighton & Sussex University Hospitals  
Broomfield Hospital, Mid Essex  
Chesterfield Royal Hospital  
Coventry Hospital  
Ealing Hospital  
East Kent Hospital  
East Surrey Hospital  
Fife NHS Trust  
Gateshead NHS Foundation Trust  
Glasgow Royal Infirmary  
Gloucestershire Royal Hospital  
Guys and St Thomas' Hospital  
Hull and East Yorkshire NHS Trust  
Kettering General Hospital  
Kings College Hospital  
Leeds  
Lewisham & Greenwich NHS Trust  
Lincoln County Hospital  
Lister, Stevenage  
London North West healthcare NHS Trust  
Newcastle upon Tyne Hospitals NHS Foundation Trust  
NHS Grampian  
NHS Highland  
NHS Lothian  
NHS Tayside, Dundee  
Norfolk & Norwich NHS Trust  
North Bristol NHS Trust  
North Cumbria University Hospitals  
North Middlesex Hospital  
North Tees & Hartlepool  
Nottingham University Hospitals  
Oxford, John Radcliffe

Pennine Acute Hospitals NHS Trust  
Plymouth Hospitals NHS Trust  
Poole Hospital  
Portsmouth Hospital  
Prince Charles Hospital, Cwm Taf, HB  
Queen Elizabeth University Hospital, Glasgow  
Queen Elizabeth Hospital Birmingham  
Royal Alexandra Hospital, Paisley  
Royal Berkshire Hospital  
Royal Bolton Hospital  
Royal Bournemouth Hospital  
Royal Derby Hospital  
Royal Devon & Exeter Hospital  
Royal Free Hospital  
Royal Infirmary of Edinburgh  
Royal Liverpool Hospital  
Royal London Hospital  
Royal United Hospital, Bath  
Royal Victoria Hospital, Belfast  
Salisbury NHS Foundation Trust  
Shaheed Ziaur Rahman Medical College Hospital  
Sheffield  
Solihull Hospital  
South Tees NHS Foundation Trust  
South Tyneside Hospital  
St John's Hospital, Livingston  
St Marys / Imperial Healthcare  
Taunton Hospital  
Torbay  
Toronto General hospital  
UHNH Royal Stoke Hospital  
University Hospital Bristol  
University Hospital of Wales  
University Hospitals Leicester  
Western Sussex Hospitals NHS Foundation Trust  
(Worthing & Chichester)  
Wirral University Hospital  
Wishaw General Hospital, Lanarkshire  
Withybush Hospital, Hyl Dda HB  
Worcester Hospital  
Wrightinton, Wigan and Leigh NHS Foundation Trust  
Wye Valley
