# Supplementary material
Source: PubMed Central journal article supplement (PMC5641855)
Supplement: flgastro-2017-100806supp002.pdf [file flgastro-2017-100806supp002.pdf]

## Appendix 2: Full list of survey questions

### Q1. Do you have local hospital guidelines for assessment of NAFLD?

Please describe your centre according to one of the following categories:

| Answer Choices                                                                                            | Responses |
|-----------------------------------------------------------------------------------------------------------|-----------|
| District General Hospital, liver services provided by general gastroenterology                            | 30        |
| District General Hospital, liver services delivered by gastroenterologists with an interest in hepatology | 50        |
| A specialist centre providing designated hepatology services                                              | 67        |
| A liver transplant unit                                                                                   | 28        |
| We have local NAFLD guidelines                                                                            | 38        |

**Q2 How many referrals does your unit receive per year from for investigation of abnormal LFTs, from Primary Care; Diabetes / metabolic; Rheumatology / Dermatology?**

|                        | From Primary care – | From diabetes / metabolic medicine services – | From rheumatology / dermatology– |
|------------------------|---------------------|-----------------------------------------------|----------------------------------|
| <b>&lt;50</b>          | 5 (5%)              | 63(64%)                                       | 64 (65%)                         |
| <b>51-100</b>          | 14 (13%)            | 29 (29%)                                      | 26 (27%)                         |
| <b>101-200</b>         | 23 (21%)            | 5 (5%)                                        | 6 (6%)                           |
| <b>201-300</b>         | 19 (17%)            | 0                                             | 0                                |
| <b>&gt;300</b>         | 49 (44%)            | 2 (2%)                                        | 2 (2%)                           |
| <b>Total Responses</b> | <b>110</b>          | <b>99</b>                                     | <b>98</b>                        |
| <b>don't know</b>      | 35                  | 39                                            | 40                               |

**Q3 When triaging a referral with abnormal LFTs in your unit with suspected NAFLD, which of the following tests are performed routinely by the referring primary care team or receiving secondary care team?**

|                                                | Routinely performed by GP before first hospital visit | Performed routinely by hospital team at or following initial visit in all patients | Performed in selected cases | Not routinely performed in our unit | Total Respondents | Missing / incomplete responses |
|------------------------------------------------|-------------------------------------------------------|------------------------------------------------------------------------------------|-----------------------------|-------------------------------------|-------------------|--------------------------------|
| Body Mass Index                                | 25.86%<br>30                                          | 82.76%<br>96                                                                       | 7.76%<br>9                  | 1.72%<br>2                          | 116               | 0                              |
| Alcohol history                                | 55.17%<br>64                                          | 79.31%<br>92                                                                       | 1.72%<br>2                  | 0.86%<br>1                          | 116               | 0                              |
| Waist circumference                            | 1.16%<br>1                                            | 17.44%<br>15                                                                       | 29.07%<br>25                | 55.81%<br>48                        | 86                | 30                             |
| GGT                                            | 42.59%<br>46                                          | 58.33%<br>63                                                                       | 9.26%<br>10                 | 15.74%<br>17                        | 108               | 8                              |
| AST                                            | 33.63%<br>38                                          | 71.68%<br>81                                                                       | 8.85%<br>10                 | 4.42%<br>5                          | 113               | 3                              |
| ALT                                            | 70.43%<br>81                                          | 69.57%<br>80                                                                       | 0.00%<br>0                  | 0.87%<br>1                          | 115               | 1                              |
| Ferritin                                       | 22.61%<br>26                                          | 87.83%<br>101                                                                      | 1.74%<br>2                  | 1.74%<br>2                          | 115               | 1                              |
| Hepatitis B and C serology                     | 32.76%<br>38                                          | 86.21%<br>100                                                                      | 3.45%<br>4                  | 0.00%<br>0                          | 116               | 0                              |
| Liver auto-antibody screen and immunoglobulins | 19.13%<br>22                                          | 91.30%<br>105                                                                      | 1.74%<br>2                  | 0.00%<br>0                          | 115               | 1                              |
| Liver and biliary tree ultrasound scan         | 37.07%<br>43                                          | 81.03%<br>94                                                                       | 2.59%<br>3                  | 0.00%<br>0                          | 116               | 0                              |
| Fibroscan                                      | 0.00%<br>0                                            | 50.88%<br>58                                                                       | 40.35%<br>46                | 8.77%<br>10                         | 114               | 2                              |
| ELF test or other serum fibrosis marker        | 2.08%<br>2                                            | 6.25%<br>6                                                                         | 10.42%<br>10                | 83.33%<br>80                        | 96                | 20                             |
| Fatty Liver Index (FLI) score                  | 1.06%<br>1                                            | 5.32%<br>5                                                                         | 6.38%<br>6                  | 89.36%<br>84                        | 94                | 22                             |
| NAFLD Fibrosis score                           | 6.60%<br>7                                            | 45.28%<br>48                                                                       | 27.36%<br>29                | 27.36%<br>29                        | 106               | 10                             |
| APRI score                                     | 0.00%<br>0                                            | 8.79%<br>8                                                                         | 19.78%<br>18                | 71.43%<br>65                        | 91                | 25                             |
| FIB-4 score                                    | 3.13%<br>3                                            | 19.79%<br>19                                                                       | 15.63%<br>15                | 63.54%<br>61                        | 95                | 21                             |
| AST / ALT ratio                                | 7.84%<br>8                                            | 57.94%<br>62                                                                       | 22.43%<br>24                | 19.63%<br>21                        | 107               | 9                              |
| Cytokeratin 18                                 | 0.00%<br>0                                            | 3.16%<br>3                                                                         | 4.21%<br>4                  | 94.74%<br>90                        | 95                | 21                             |

|                           | Routinely performed by GP before first hospital visit | Performed routinely by hospital team at or following initial visit in all patients | Performed in selected cases | Not routinely performed in our unit | Total Respondents | Missing / incomplete responses |
|---------------------------|-------------------------------------------------------|------------------------------------------------------------------------------------|-----------------------------|-------------------------------------|-------------------|--------------------------------|
| (M30 and / or M65)        |                                                       |                                                                                    |                             |                                     |                   |                                |
| Liver biopsy              | 0.00%<br>0                                            | 6.54%<br>7                                                                         | 84.11%<br>90                | 9.35%<br>10                         | 107               | 9                              |
| random glucose            | 24.27%<br>25                                          | 67.96%<br>70                                                                       | 11.65%<br>12                | 7.77%<br>8                          | 103               | 13                             |
| HbA1C                     | 20.00%<br>21                                          | 60.95%<br>64                                                                       | 22.86%<br>24                | 6.67%<br>7                          | 105               | 11                             |
| non-fasting lipid profile | 17.35%<br>17                                          | 66.33%<br>65                                                                       | 11.22%<br>11                | 13.27%<br>13                        | 98                | 18                             |
| fasting glucose           | 11.96%<br>11                                          | 28.26%<br>26                                                                       | 51.09%<br>47                | 14.13%<br>13                        | 92                | 24                             |
| fasting lipid profile     | 15.15%<br>15                                          | 32.32%<br>32                                                                       | 48.48%<br>48                | 13.13%<br>13                        | 99                | 17                             |
| fasting insulin           | 0.00%<br>0                                            | 2.17%<br>2                                                                         | 25.00%<br>23                | 73.91%<br>68                        | 92                | 24                             |

## Q4 In respect to liver biopsy in cases of NAFLD

|                                                                                                                            | Strongly agree | Agree        | Neither agree nor disagree | Disagree     | Strongly disagree |
|----------------------------------------------------------------------------------------------------------------------------|----------------|--------------|----------------------------|--------------|-------------------|
| is indicated with intermediate-risk non-invasive risk scores (e.g. ELF, NAFLD Fibrosis score, FIB4 score, AST / ALT ratio) | 8.93%<br>10    | 38.39%<br>43 | 28.57%<br>32               | 21.43%<br>24 | 2.68%<br>3        |
| is indicated with high-risk non-invasive risk scores (e.g. ELF, NAFLD Fibrosis score, FIB4 score, AST/ALT ratio)           | 21.24%<br>24   | 31.86%<br>36 | 17.70%<br>20               | 26.55%<br>30 | 2.65%<br>3        |
| is indicated when other non-invasive tests are unreliable (e.g. Fibroscan with IQR >30%)                                   | 16.96%<br>19   | 54.46%<br>61 | 23.21%<br>26               | 4.46%<br>5   | 0.89%<br>1        |
| is indicated with >2 metabolic syndrome features                                                                           | 0.89%<br>1     | 7.14%<br>8   | 43.75%<br>49               | 45.54%<br>51 | 2.68%<br>3        |
| is indicated with >3 metabolic syndrome features                                                                           | 2.70%<br>3     | 13.51%<br>15 | 37.84%<br>42               | 41.44%<br>46 | 4.50%<br>5        |
| is useful to exclude an alternative diagnosis e.g auto-immune liver disease                                                | 25.66%<br>29   | 58.41%<br>66 | 12.39%<br>14               | 3.54%<br>4   | 0.00%<br>0        |
| to required to make a diagnosis of NASH                                                                                    | 18.02%<br>20   | 33.33%<br>37 | 13.51%<br>15               | 30.63%<br>34 | 4.50%<br>5        |
| is poorly                                                                                                                  | 3.57%<br>4     | 20.54%<br>23 | 30.36%<br>34               | 39.29%<br>44 | 6.25%<br>7        |

|                                                     | <b>Strongly agree</b> | <b>Agree</b>        | <b>Neither agree nor disagree</b> | <b>Disagree</b>     | <b>Strongly disagree</b> |
|-----------------------------------------------------|-----------------------|---------------------|-----------------------------------|---------------------|--------------------------|
| <b>tolerated by patients</b>                        |                       |                     |                                   |                     |                          |
| <b>does not alter management of NAFLD</b>           | <b>4.46%</b><br>5     | <b>17.86%</b><br>20 | <b>25.00%</b><br>28               | <b>45.54%</b><br>51 | <b>7.14%</b><br>8        |
| <b>is helpful to understand disease progression</b> | <b>8.93%</b><br>10    | <b>53.57%</b><br>60 | <b>25.00%</b><br>28               | <b>11.61%</b><br>13 | <b>0.89%</b><br>1        |

**Q5. What lifestyle interventions and support do you regularly access for your patients with NAFLD? (tick all that apply)**

| <b>Answer Choices</b>                                                                                            | <b>Responses</b>    |
|------------------------------------------------------------------------------------------------------------------|---------------------|
| <b>a multidisciplinary clinic with dieticians and physiotherapy</b>                                              | <b>20.91%</b><br>23 |
| <b>direct access to tier 2 weight management (BMI&lt;35)</b>                                                     | <b>26.36%</b><br>29 |
| <b>direct access to tier 3 weight management services (BMI&gt;35)</b>                                            | <b>22.73%</b><br>25 |
| <b>direct access to tier 4 weight management services (BMI&gt;40) including assessment for bariatric surgery</b> | <b>26.36%</b><br>29 |
| <b>access to weight management services by referral from GP</b>                                                  | <b>56.36%</b><br>62 |
| <b>no additional lifestyle intervention support available</b>                                                    |                     |

**Q6. What advice do you give NAFLD patients about alcohol consumption?**

| <b>Answer Choices</b>                                                           | <b>Responses</b>    |
|---------------------------------------------------------------------------------|---------------------|
| To always remain completely abstinent from alcohol                              | <b>20.18%</b><br>22 |
| To drink < 14 units per week in those without advanced fibrosis                 | <b>70.64%</b><br>77 |
| Explain that alcohol is calorific and should be moderated to help reduce weight | <b>63.30%</b><br>69 |
| There is insufficient evidence to make a recommendation                         | <b>2.75%</b><br>3   |
| I do not routinely advise on safe alcohol consumption                           | <b>1.83%</b><br>2   |

Total Respondents: 109



**Q7. With respect to interventions in cases of NAFLD / NASH do you recommend and / or prescribe the following:**

|                                                                    | <b>I usually / routinely do this–</b> | <b>I do this occasionally in selected cases–</b> | <b>I never do this–</b> |
|--------------------------------------------------------------------|---------------------------------------|--------------------------------------------------|-------------------------|
| <b>dietary advice</b>                                              | 96.40%<br>107                         | 3.60%<br>4                                       | 0.00%<br>0              |
| <b>exercise advice</b>                                             | 94.59%<br>105                         | 5.41%<br>6                                       | 0.00%<br>0              |
| <b>weight loss target of &gt;5%</b>                                | 47.87%<br>45                          | 30.85%<br>29                                     | 21.28%<br>20            |
| <b>weight loss target of &gt;10%</b>                               | 53.40%<br>55                          | 35.92%<br>37                                     | 10.68%<br>11            |
| <b>vitamin E</b>                                                   | 1.83%<br>2                            | 23.85%<br>26                                     | 74.31%<br>81            |
| <b>specific insulin sensitisers e.g. pioglitazone, liraglutide</b> | 1.83%<br>2                            | 46.79%<br>51                                     | 51.38%<br>56            |
| <b>omega-3 supplements</b>                                         | 0.00%<br>0                            | 10.00%<br>11                                     | 90.00%<br>99            |
| <b>specific lipid lowering therapies</b>                           | 13.51%<br>15                          | 54.95%<br>61                                     | 31.53%<br>35            |
| <b>probiotics</b>                                                  | 0.00%<br>0                            | 5.50%<br>6                                       | 94.50%<br>103           |

**Q8. Who manages features of metabolic syndrome in the patients you see with NAFLD?**

|                                                                                          | Specifically managed by you– | you provide advice to GP or other healthcare provider to manage this– | you request GP to manage this– | you don't advise on this– | your centre has a multidisciplinary metabolic service to manage this– |
|------------------------------------------------------------------------------------------|------------------------------|-----------------------------------------------------------------------|--------------------------------|---------------------------|-----------------------------------------------------------------------|
| type 2 diabetes<br>e.g. advice on specific treatments and glycaemic control<br>e.g.HbA1c | 0.91%<br>1                   | 40.00%<br>44                                                          | 47.27%<br>52                   | 0.91%<br>1                | 10.91%<br>12                                                          |
| obesity                                                                                  | 4.59%<br>5                   | 46.79%<br>51                                                          | 31.19%<br>34                   | 0.92%<br>1                | 16.51%<br>18                                                          |
| hypertension                                                                             | 0.91%<br>1                   | 24.55%<br>27                                                          | 63.64%<br>70                   | 2.73%<br>3                | 8.18%<br>9                                                            |
| hyperlipidaemia                                                                          | 1.82%<br>2                   | 33.64%<br>37                                                          | 51.82%<br>57                   | 1.82%<br>2                | 10.91%<br>12                                                          |
| cardiovascular risk profile e.g. QRISK2 score & statin prescribing                       | 1.83%<br>2                   | 29.36%<br>32                                                          | 54.13%<br>59                   | 7.34%<br>8                | 7.34%<br>8                                                            |
| obstructive sleep apnoea                                                                 | 0.92%<br>1                   | 43.12%<br>47                                                          | 23.85%<br>26                   | 20.18%<br>22              | 11.93%<br>13                                                          |

**Q9. Which of the following imaging modalities are available in your unit?**

|                                                                             | Routinely available and used – | Available, but used for selected cases only including research studies – | Unavailable at our unit – | Don't know –        |
|-----------------------------------------------------------------------------|--------------------------------|--------------------------------------------------------------------------|---------------------------|---------------------|
| Transient Elastography (Fibroscan) M Probe                                  | <b>70.37%</b><br>76            | <b>6.48%</b><br>7                                                        | <b>20.37%</b><br>22       | <b>2.78%</b><br>3   |
| Transient Elastography (Fibroscan) XL Probe                                 | <b>63.89%</b><br>69            | <b>6.48%</b><br>7                                                        | <b>24.07%</b><br>26       | <b>5.56%</b><br>6   |
| Controlled attenuation parameter (CAP)                                      | <b>28.57%</b><br>30            | <b>4.76%</b><br>5                                                        | <b>56.19%</b><br>59       | <b>10.48%</b><br>11 |
| Acoustic radiation force impulse (ARFI)                                     | <b>5.61%</b><br>6              | <b>12.15%</b><br>13                                                      | <b>71.03%</b><br>76       | <b>11.21%</b><br>12 |
| MRI elastography                                                            | <b>0.94%</b><br>1              | <b>15.09%</b><br>16                                                      | <b>73.58%</b><br>78       | <b>10.38%</b><br>11 |
| Magnetic Resonance Imaging estimated proton density fat fraction (MRI-PDFF) | <b>0.93%</b><br>1              | <b>14.95%</b><br>16                                                      | <b>68.22%</b><br>73       | <b>15.89%</b><br>17 |
| Magnetic Resonance Spectroscopy – proton density fat fraction (MRS-PDFF)    | <b>0.93%</b><br>1              | <b>14.81%</b><br>16                                                      | <b>68.52%</b><br>74       | <b>15.74%</b><br>17 |

**Q10. Please describe to what extent the following factors influence your decision to follow up or discharge a patient with NAFLD from your clinic.**

|                                                                                            | Strongly favours ongoing follow up | Favours ongoing follow up | Neutral      | Favours discharge to primary care | Strongly favours discharge to primary care |
|--------------------------------------------------------------------------------------------|------------------------------------|---------------------------|--------------|-----------------------------------|--------------------------------------------|
| A child or young person with evidence of NAFLD                                             | 22.43%<br>24                       | 45.79%<br>49              | 16.82%<br>18 | 14.95%<br>16                      | 0.00%<br>0                                 |
| The presence of Type 2 diabetes                                                            | 7.55%<br>8                         | 34.91%<br>37              | 47.17%<br>50 | 10.38%<br>11                      | 0.00%<br>0                                 |
| South Asian ethnicity                                                                      | 1.89%<br>2                         | 31.13%<br>33              | 57.55%<br>61 | 9.43%<br>10                       | 0.00%<br>0                                 |
| Low risk non-invasive investigations for advanced fibrosis                                 | 1.85%<br>2                         | 2.78%<br>3                | 9.26%<br>10  | 61.11%<br>66                      | 25.00%<br>27                               |
| Intermediate risk non-invasive investigations for advanced fibrosis                        | 7.55%<br>8                         | 52.83%<br>56              | 25.47%<br>27 | 14.15%<br>15                      | 0.00%<br>0                                 |
| High risk non-invasive investigations for advanced fibrosis                                | 51.85%<br>56                       | 40.74%<br>44              | 2.78%<br>3   | 3.70%<br>4                        | 0.93%<br>1                                 |
| Current pressures on clinic capacity                                                       | 2.83%<br>3                         | 7.55%<br>8                | 51.89%<br>55 | 33.02%<br>35                      | 4.72%<br>5                                 |
| Individual is unlikely or unable to lose weight                                            | 0.00%<br>0                         | 18.87%<br>20              | 54.72%<br>58 | 24.53%<br>26                      | 1.89%<br>2                                 |
| Liver biopsy showing simple / bland steatosis without inflammation, ballooning or fibrosis | 0.93%<br>1                         | 8.33%<br>9                | 9.26%<br>10  | 51.85%<br>56                      | 29.63%<br>32                               |
| Liver biopsy showing NASH (NAS score >4) with early F1 fibrosis                            | 13.33%<br>14                       | 43.81%<br>46              | 17.14%<br>18 | 25.71%<br>27                      | 0.00%<br>0                                 |
| Liver biopsy showing NASH with moderate F2 fibrosis                                        | 38.68%<br>41                       | 40.57%<br>43              | 8.49%<br>9   | 12.26%<br>13                      | 0.00%<br>0                                 |
| Liver biopsy showing NASH with advanced F3/F4 fibrosis                                     | 73.15%<br>79                       | 25.93%<br>28              | 0.93%<br>1   | 0.00%<br>0                        | 0.00%<br>0                                 |
| Lack of robust recall guidelines for primary care                                          | 5.56%<br>6                         | 31.48%<br>34              | 58.33%<br>63 | 2.78%<br>3                        | 1.85%<br>2                                 |
