# Supplementary material
Source: PubMed Central journal article supplement (PMC5641855)

## Supplementary Figures

### Supplementary Figure 1

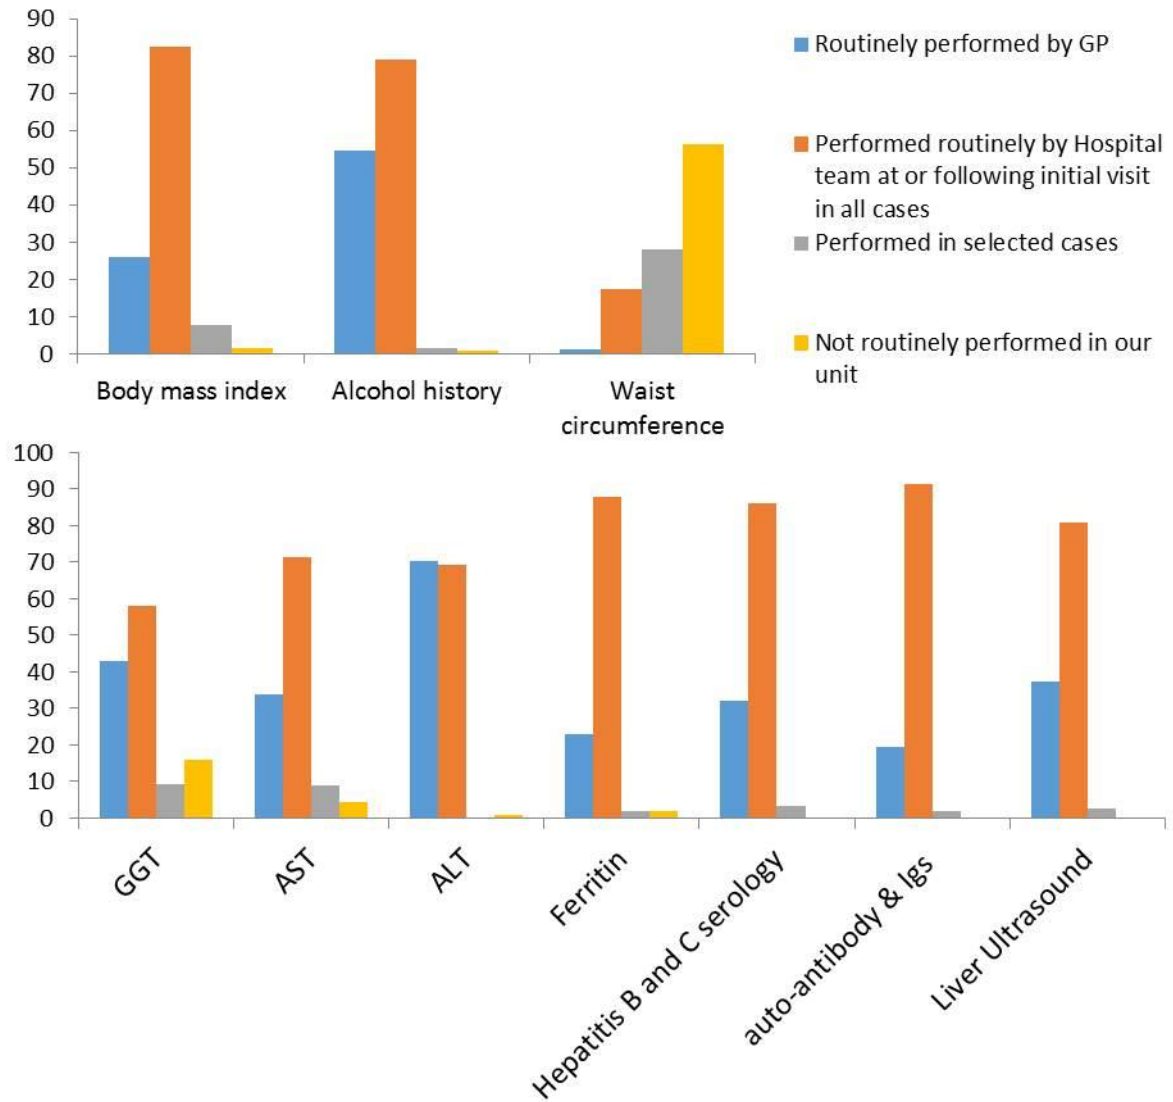

Supplementary Figure 2

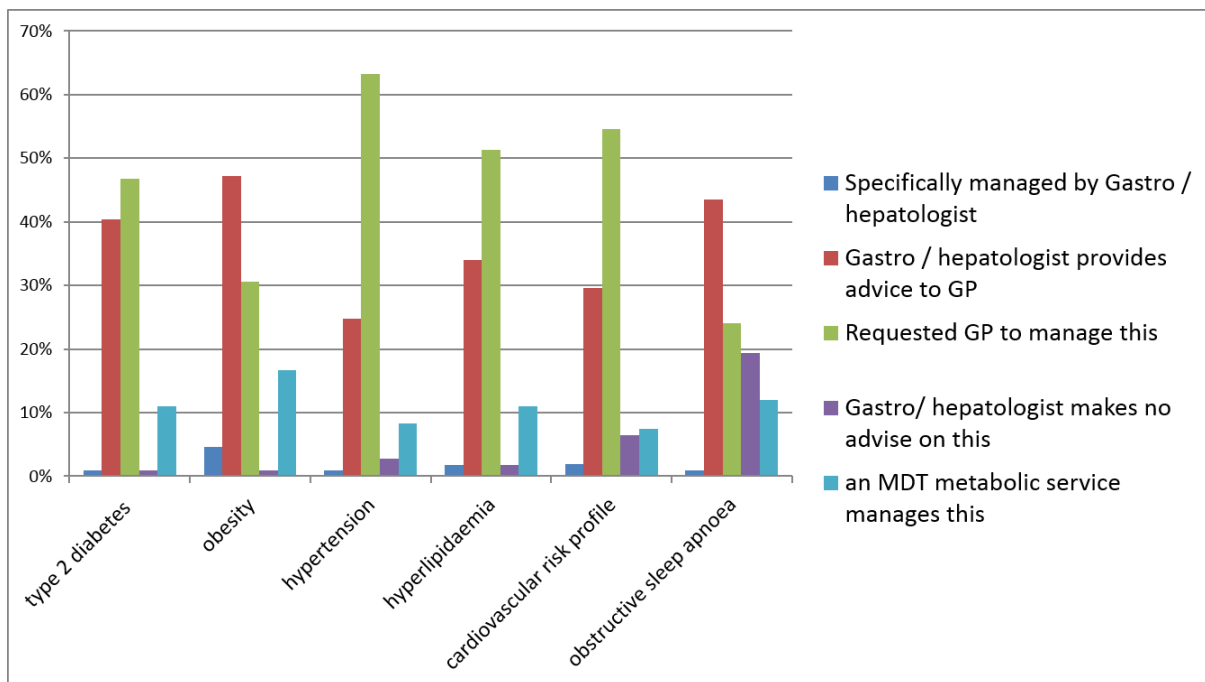

Supplementary Figure 3

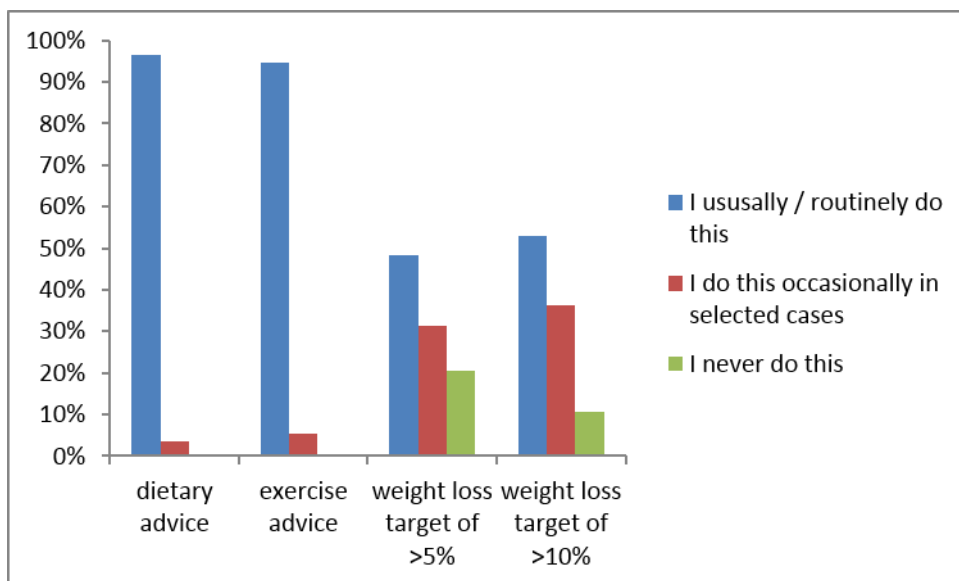

Supplementary Figure 4

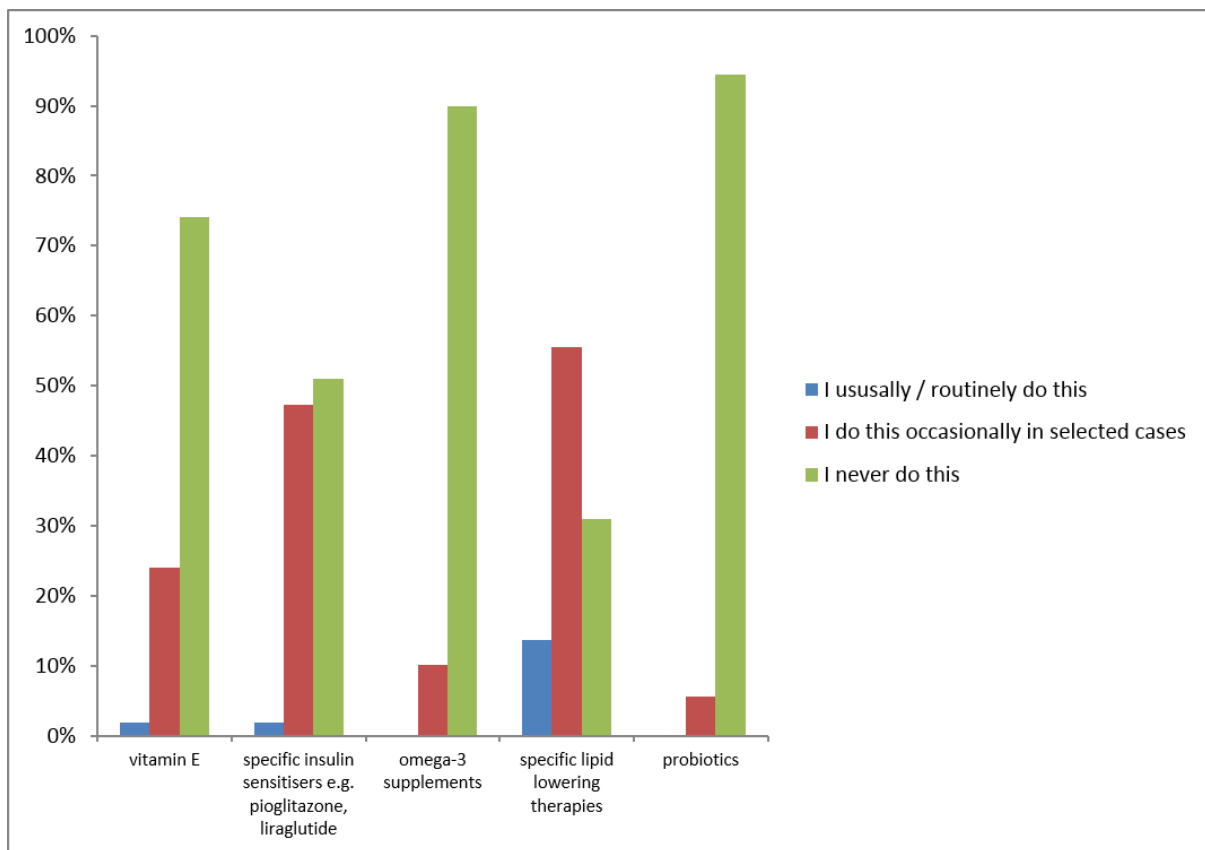

Supplement: flgastro-2017-100806supp003.pdf [file flgastro-2017-100806supp003.pdf]
